# Supplementary material for: Inferring signalling networks from longitudinal data using sampling based approaches in the R-package 'ddepn'
Source: Springer Nature journal article supplement (doi:10.1186/1471-2105-12-291), 2011-07-19

Prior curve,  $\gamma=1$

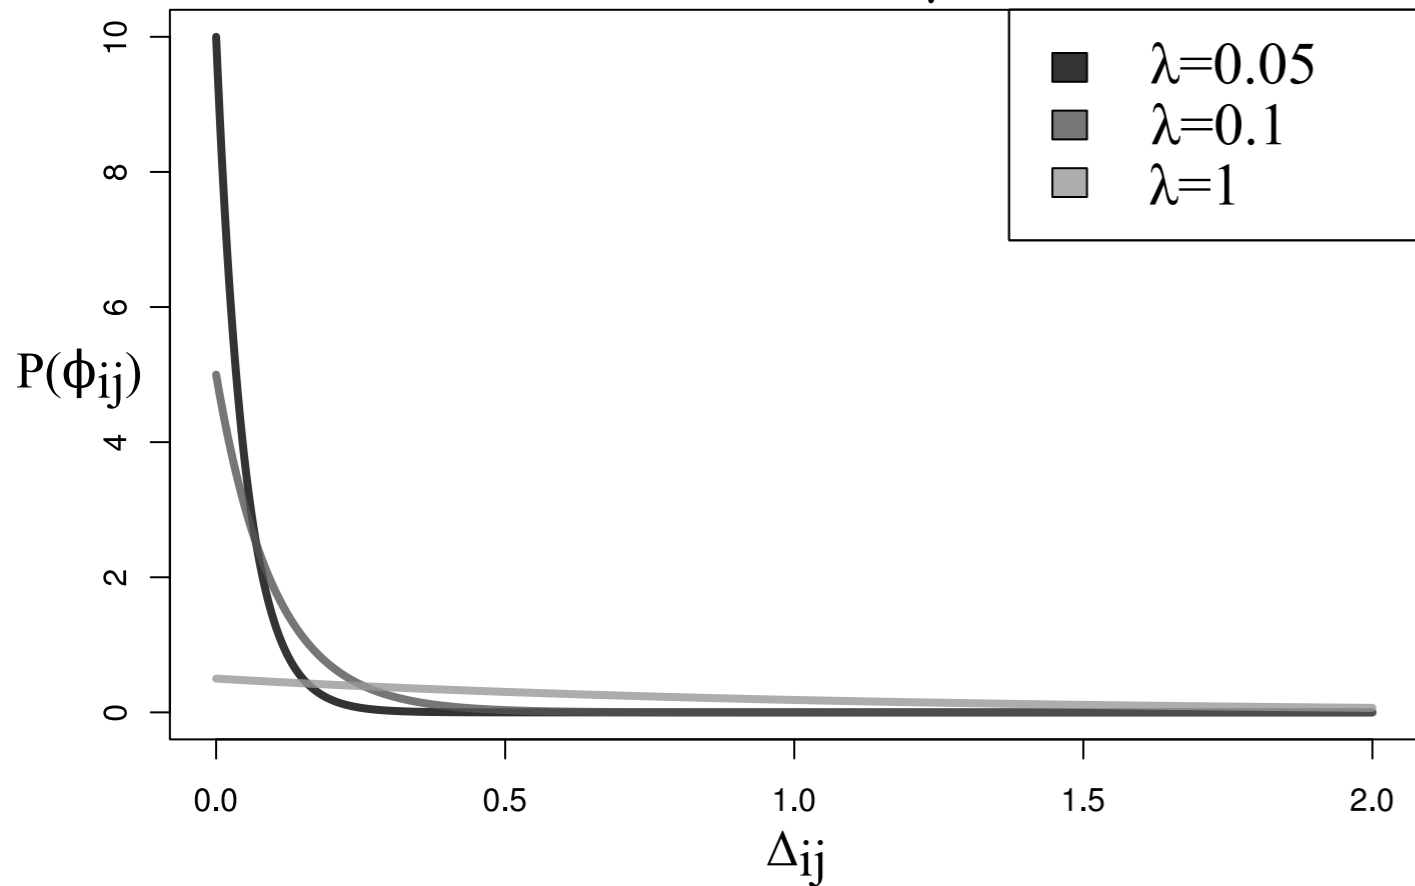

Prior curve,  $\lambda=0.01$

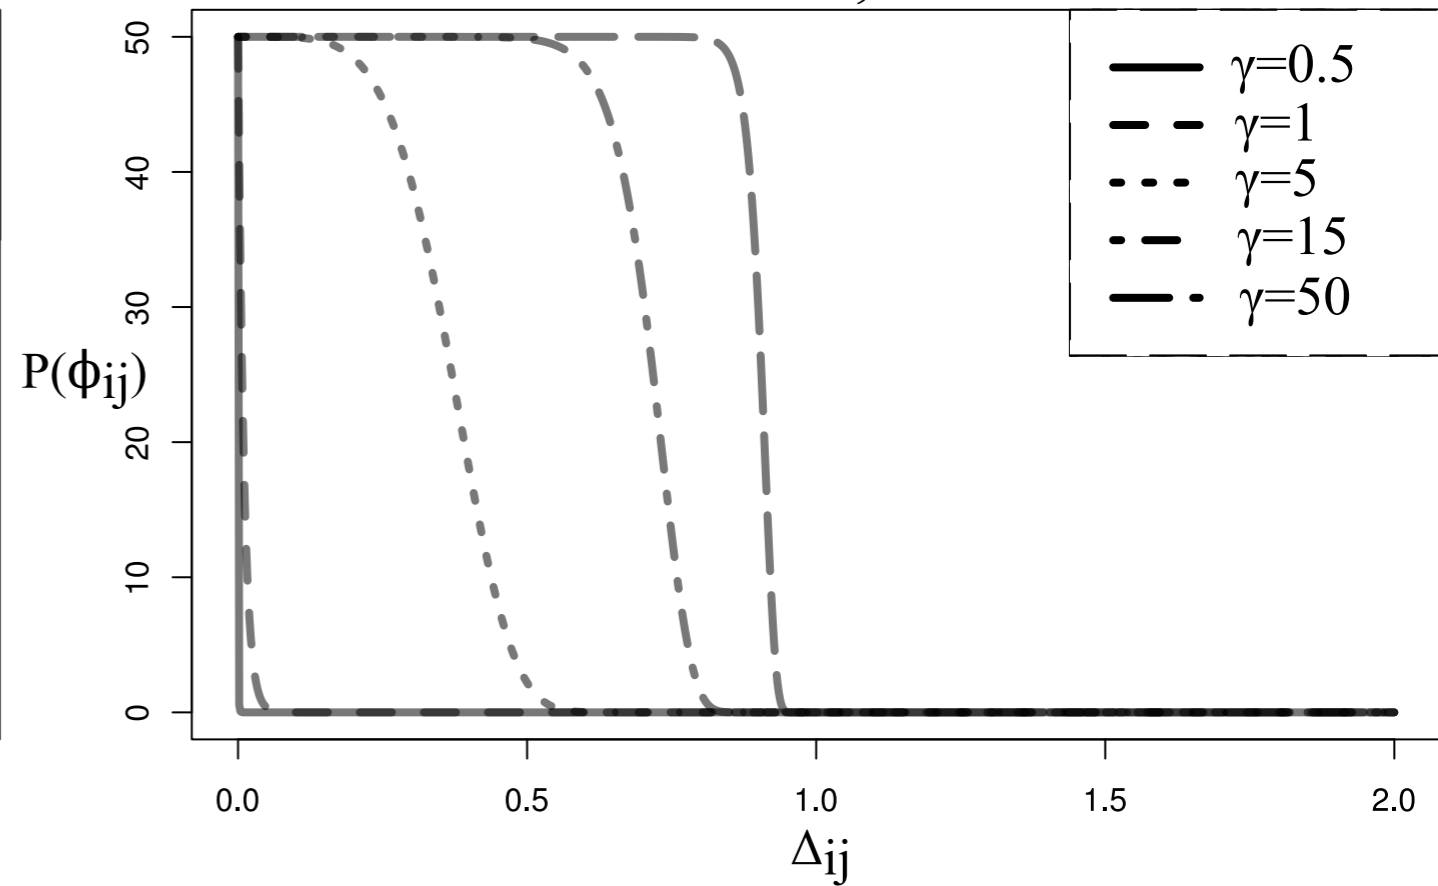

Supplement: 12859_2010_4674_MOESM3_ESM.pdf [file 12859_2010_4674_MOESM3_ESM.pdf]
